# Supplementary material
Source: PubMed Central journal article supplement (PMC3238382)
Supplement: NIHMS338623-supplement-1.pdf [file NIHMS338623-supplement-1.pdf]

## SUPPLEMENTAL MATERIAL

**Supplemental Table. Characteristics at Baseline and Last Examinations by Combinations of Changes in Cardiorespiratory Fitness and Body Mass Index in 14 345 Men.**

|                                    | BMI change     |        |        |                |        |        |                |        |        |
|------------------------------------|----------------|--------|--------|----------------|--------|--------|----------------|--------|--------|
|                                    | Loss           |        |        | Stable         |        |        | Gain           |        |        |
|                                    | Fitness Change |        |        | Fitness Change |        |        | Fitness Change |        |        |
|                                    | Loss           | Stable | Gain   | Loss           | Stable | Gain   | Loss           | Stable | Gain   |
| Body weight, kg                    |                |        |        |                |        |        |                |        |        |
| At baseline                        | 84.4           | 85.9   | 87.2   | 81.0           | 81.0   | 80.7   | 84.2           | 83.7   | 82.8   |
|                                    | (11.6)         | (12.6) | (13.2) | (10.4)         | (10.3) | (10.5) | (12.4)         | (12.2) | (12.2) |
| At last                            | 81.5           | 82.3   | 82.6   | 82.7           | 82.2   | 80.9   | 91.3           | 89.0   | 85.6   |
|                                    | (11.6)         | (11.8) | (11.8) | (10.7)         | (10.5) | (10.5) | (14.2)         | (13.0) | (12.5) |
| Body mass index, kg/m <sup>2</sup> |                |        |        |                |        |        |                |        |        |
| At baseline                        | 26.3           | 26.8   | 27.2   | 25.1           | 25.2   | 25.2   | 26.1           | 26.0   | 25.7   |
|                                    | (3.2)          | (3.5)  | (3.6)  | (2.7)          | (2.7)  | (2.8)  | (3.3)          | (3.4)  | (3.3)  |
| At last                            | 25.3           | 25.6   | 25.7   | 25.8           | 25.7   | 25.4   | 28.4           | 27.8   | 26.7   |
|                                    | (3.1)          | (3.2)  | (3.2)  | (2.7)          | (2.7)  | (2.8)  | (4.0)          | (3.7)  | (3.4)  |

Cardiorespiratory fitness, maximal

METs

|             |       |       |       |       |       |       |       |       |       |
|-------------|-------|-------|-------|-------|-------|-------|-------|-------|-------|
| At baseline | 12.4  | 11.6  | 11.0  | 13.2  | 11.9  | 11.6  | 12.7  | 11.5  | 11.3  |
|             | (2.4) | (2.2) | (2.2) | (2.4) | (2.0) | (2.3) | (2.4) | (2.1) | (2.2) |
| At last     | 11.2  | 11.9  | 12.8  | 11.4  | 12.2  | 13.3  | 11.1  | 11.7  | 12.5  |
|             | (2.3) | (2.2) | (2.3) | (2.2) | (2.1) | (2.5) | (2.2) | (2.1) | (2.3) |

Systolic blood pressure, mm Hg

|             |      |      |      |      |      |      |      |      |      |
|-------------|------|------|------|------|------|------|------|------|------|
| At baseline | 123  | 123  | 123  | 120  | 120  | 120  | 120  | 120  | 120  |
|             | (14) | (14) | (14) | (13) | (13) | (12) | (13) | (13) | (12) |
| At last     | 121  | 122  | 120  | 124  | 123  | 119  | 124  | 123  | 120  |
|             | (14) | (14) | (13) | (15) | (14) | (13) | (14) | (13) | (12) |

Diastolic blood pressure, mm Hg

|             |        |        |         |        |        |        |         |        |        |
|-------------|--------|--------|---------|--------|--------|--------|---------|--------|--------|
| At baseline | 82 (9) | 82 (9) | 82 (10) | 80 (9) | 80 (9) | 80 (9) | 80 (9)  | 80 (9) | 81 (9) |
| At last     | 80 (9) | 81 (9) | 80 (9)  | 82 (9) | 82 (9) | 80 (9) | 84 (10) | 82 (9) | 81 (9) |

Fasting glucose, mg/dL

|             |        |        |        |        |        |        |        |        |        |
|-------------|--------|--------|--------|--------|--------|--------|--------|--------|--------|
| At baseline | 103.3  | 101.8  | 101.8  | 99.9   | 99.0   | 98.2   | 98.8   | 98.8   | 98.7   |
|             | (23.3) | (17.7) | (18.5) | (12.5) | (12.4) | (11.7) | (13.5) | (11.7) | (13.7) |
| At last     | 99.9   | 99.8   | 98.8   | 99.1   | 99.6   | 98.4   | 100.6  | 100.0  | 99.3   |

|                                |        |        |        |        |        |        |        |        |        |
|--------------------------------|--------|--------|--------|--------|--------|--------|--------|--------|--------|
|                                | (20.8) | (18.4) | (16.7) | (12.4) | (16.7) | (11.8) | (14.3) | (13.1) | (14.1) |
| Total cholesterol, mg/dL       |        |        |        |        |        |        |        |        |        |
| At baseline                    | 212.9  | 211.0  | 214.3  | 209.0  | 207.6  | 206.5  | 202.4  | 207.4  | 205.6  |
|                                | (38.6) | (39.0) | (41.7) | (37.2) | (36.9) | (38.5) | (37.7) | (38.9) | (39.0) |
| At last                        | 202.2  | 198.8  | 201.2  | 198.7  | 201.7  | 202.8  | 206.2  | 211.1  | 206.5  |
|                                | (39.3) | (36.7) | (38.0) | (34.9) | (38.8) | (36.6) | (38.3) | (40.7) | (37.9) |
| Abnormal electrocardiogram, %* |        |        |        |        |        |        |        |        |        |
| At baseline                    | 11     | 8      | 8      | 6      | 5      | 6      | 5      | 5      | 6      |
| At last                        | 17     | 13     | 8      | 19     | 13     | 6      | 12     | 10     | 6      |
| Current smoker, %              |        |        |        |        |        |        |        |        |        |
| At baseline                    | 18     | 15     | 15     | 12     | 16     | 17     | 16     | 21     | 22     |
| At last                        | 16     | 15     | 13     | 10     | 10     | 12     | 12     | 13     | 14     |
| Heavy drinker, %†              |        |        |        |        |        |        |        |        |        |
| At baseline                    | 18     | 18     | 17     | 17     | 20     | 18     | 17     | 18     | 19     |
| At last                        | 12     | 11     | 13     | 11     | 13     | 15     | 12     | 14     | 17     |
| Physically inactive, %‡        |        |        |        |        |        |        |        |        |        |
| At baseline                    | 24     | 28     | 33     | 17     | 30     | 32     | 22     | 31     | 31     |
| At last                        | 29     | 22     | 16     | 24     | 21     | 15     | 28     | 28     | 19     |

Parental CVD, %

|             |    |    |    |    |    |    |    |    |    |
|-------------|----|----|----|----|----|----|----|----|----|
| At baseline | 31 | 33 | 28 | 30 | 26 | 27 | 26 | 25 | 29 |
| At last     | 23 | 30 | 26 | 26 | 27 | 26 | 26 | 27 | 27 |

---

Data are presented as mean (SD) unless otherwise indicated.

\* Defined as abnormal resting or exercise electrocardiogram.

† Defined as >14 alcohol drinks per week.

‡ Defined as no leisure-time physical activity in the past 3 months before the examination.
